# Supplementary material for: Indole-functionalized cross-linked chitosan for effective uptake of uranium(vi) from aqueous solution
Source: Royal Society of Chemistry journal article supplement (doi:10.1039/d1py01725j), 2022-01-01
Supplement: d1py01725j1.pdf [file d1py01725j1.pdf]

## ***Supporting Information***

### **Indole-functionalized cross-linked chitosan for effective uptake of uranium(VI) from aqueous solution**

Yan Wang<sup>a</sup>, Yuyong Ai<sup>a</sup>, Xiaolin Liu<sup>a</sup>, Bowei Chen<sup>a\*</sup> and Yong Zhang<sup>b\*</sup>

<sup>a</sup>School of Mathematics and Physics, Mianyang Teachers' College, Mianyang 621000, PR China.

<sup>b</sup>State Key Laboratory of Environment-friendly Energy Materials, Sichuan Co-Innovation Center for New Energetic Materials, National Co-innovation Center for Nuclear Waste Disposal and Environmental Safety, Nuclear Waste and Environmental Safety Key Laboratory of Defense, School of National Defence Science & Technology, Southwest University of Science and Technology, Mianyang 621010, China.

Corresponding author: Prof. Bowei Chen, Email: [feishuitougao@163.com](mailto:feishuitougao@163.com);

Prof. Yong Zhang, Email: [yongpandm@swust.edu.cn](mailto:yongpandm@swust.edu.cn)

## SEM images

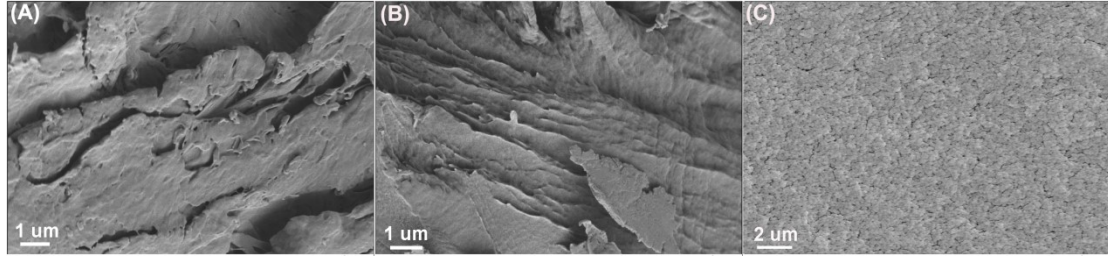

**Figure S1** The SEM images of (A) CTS, (B) IAA-CTS and (C) IAA-CTSA.

## Kinetic models

The equations of the pseudo-first-order, pseudo-second-order, intraparticle diffusion and Elovich models are described as [1, 2]:

$$\ln(q_e - q_t) = \ln q_t - k_1 t \quad (S1)$$

$$\frac{t}{q_e} = \frac{1}{k_2 q_e^2} + \frac{t}{q_e} \quad (S2)$$

$$q_t = k_{ip} t^{1/2} + c \quad (S3)$$

$$q_t = \frac{\ln(\alpha\beta)}{\beta} + \frac{1}{\beta} \ln t \quad (S4)$$

where  $q_t$   $\text{mg g}^{-1}$  is the adsorption capacity at time  $t$  (min),  $k_1$  ( $\text{min}^{-1}$ ) and  $k_2$  ( $\text{g mg}^{-1} \text{min}^{-1}$ ) refer the pseudo-first-order and pseudo-second-order rate constant, respectively.  $k_{ip}$  ( $\text{mg g}^{-1} \text{min}^{-1/2}$ ) is the constant of intraparticle diffusion kinetic model. In Elovich model  $\beta$  ( $\text{g mg}^{-1}$ ) represents the Elovich constant related to the surface coverage extent and  $\alpha$  ( $\text{mg g}^{-1} \text{min}^{-1}$ ) is the initial rate of U(VI) adsorption.

## Isotherms models

The forms of Langmuir model, Freundlich model and  $R_L$  are described as equation S5-S7 [3-5], respectively.

$$\frac{c_e}{q_e} = \frac{c_e}{q_m} + \frac{1}{q_m b} \quad (S5)$$

$$\ln q_e = \ln k_F + n \ln c_e \quad (\text{S6})$$

$$R_L = \frac{1}{1 + bC_0}$$

(S7)

Where  $b$  ( $\text{L mg}^{-1}$ ) is the Langmuir constant.  $q_{\max}$  is the maximum adsorption capacity.  $k_F$  ( $\text{mg g}^{-1}$ ) refers the multilayer adsorption capacity and  $n$  denotes an empirical parameter connected with the intensity of adsorption, respectively.

## References

- [S1] E. El Hayek, C. Torres, L. Rodriguez-Freire, J. M. Blake, C. L. De Vore, A. J. Brearley, M. N. Spilde, S. Cabaniss, A. S. Ali and J. M. Cerrato, *Environ. Sci. Technol.*, 2018, **52**, 13089-13098.
- [S2] K. Z. Elwakeel, A. A. Atia and E. Guibal, *Bioresour. Technol.*, 2014, **160**, 107-114.
- [S3] Y. Cai, L. Chen, S. Yang, L. Xu, H. Qin, Z. Liu, L. Chen, X. Wang and S. Wang, *ACS Sustain. Chem. Eng.*, 2019, **7**, 5393-5403.
- [S4] T. Huang, Y. Shao, Q. Zhang, Y. Deng, Z. Liang, F. Guo, P. Li and Y. Wang, *ACS Sustain. Chem. Eng.*, 2019, **7**, 8775-8788.
- [S5] K. Y. Foo and B. H. Hameed, *Chem. Eng. J.*, 2010, **156**, 2-10.
